# Supplementary material
Source: HighWire-hosted journal article supplement (https://bmjopen.bmj.com/content/15/4/e096997)
Supplement: inline-supplementary-material-3 [file inline-supplementary-material-3.pdf]

SUPPLEMENTARY MATERIAL 3: FLOWCHART OF TIMING IN COLLECTION OF DIFFERENT VARIABLES

**Table 1:** Flowchart of timing in collection of different variables. CA, cardiac arrest; SOFA, Sequential organ failure assessment; SAPS II, Simplified acute physiology score II; FOUR score, Full outline of unresponsiveness score; ICU, intensive care unit.

| Data                                                                                                | Inclusion Day 0 | H0 to H24 | H24 to H72 | D1 | D2 | D3 | D4 | ICU discharge | Hospital discharge | D28 | D180 |
|-----------------------------------------------------------------------------------------------------|-----------------|-----------|------------|----|----|----|----|---------------|--------------------|-----|------|
| Eligibility screen                                                                                  | X               |           |            |    |    |    |    |               |                    |     |      |
| Informed consent signed or emergency procedure                                                      | X               |           |            |    |    |    |    |               |                    |     |      |
| Demographic data                                                                                    | X               |           |            |    |    |    |    |               |                    |     |      |
| Comorbidities                                                                                       | X               |           |            |    |    |    |    |               |                    |     |      |
| Modified Rankin Scale                                                                               | X (before CA)   |           |            |    |    |    |    | X             |                    |     | X    |
| Clinical Frailty Scale                                                                              | X (before CA)   |           |            |    |    |    |    |               |                    |     | X    |
| Characteristics of CA                                                                               | X               |           |            |    |    |    |    |               |                    |     |      |
| Hemodynamic and clinical data                                                                       | X               | X         | X          |    |    |    |    |               |                    |     |      |
| Neurological examination                                                                            | X               |           |            |    |    |    |    |               |                    |     |      |
| Laboratory tests (at the discretion of the physician)                                               | X               |           |            | X  | X  | X  | X  |               |                    |     |      |
| Electrocardiogram                                                                                   | X               |           |            | X  | X  | X  |    |               |                    |     |      |
| SOFA score                                                                                          | X               |           |            |    |    |    |    |               |                    |     |      |
| Cardiac function evaluation or invasive hemodynamic monitoring (at the discretion of the physician) | X               |           |            | X  | X  | X  |    |               |                    |     |      |
| Complications (between inclusion and D7)                                                            |                 |           |            |    |    |    |    | X             |                    |     |      |
| SAPS II                                                                                             |                 |           |            | X  |    |    |    |               |                    |     |      |
| Catecholamines                                                                                      |                 | X         | X          |    |    |    |    |               |                    |     |      |
| Sedation and analgesia                                                                              |                 | X         | X          | X  | X  | X  | X  |               |                    |     |      |
| Vital status                                                                                        |                 |           |            | X  | X  | X  | X  | X             | X                  | X   | X    |
| Glasgow score                                                                                       | X               |           |            |    |    |    |    |               |                    |     |      |
| FOUR Score                                                                                          | X               |           |            |    |    |    |    |               |                    |     |      |

|                                       |               |  |  |  |  |  |   |   |   |   |   |
|---------------------------------------|---------------|--|--|--|--|--|---|---|---|---|---|
|                                       |               |  |  |  |  |  |   |   |   |   |   |
| Characteristics of ICU stay           |               |  |  |  |  |  |   | X |   |   |   |
| Characteristics of organ support      |               |  |  |  |  |  |   | X |   | X |   |
| Neuroprognostication                  |               |  |  |  |  |  | X | X |   |   |   |
| Telephone interview                   |               |  |  |  |  |  |   |   |   |   | X |
| Living situation                      |               |  |  |  |  |  |   |   |   |   | X |
| EuroQol-5D-5L                         | X (before CA) |  |  |  |  |  |   |   |   |   | X |
| Patient consent (as soon as possible) |               |  |  |  |  |  |   | X | X | X | X |
